# Supplementary material for: Overexpression of Aurora-C interferes with the spindle checkpoint by promoting the degradation of Aurora-B
Source: PubMed Central journal article supplement — Cell Death Dis. 2014 Mar 6;5(3):e1106–. doi: 10.1038/cddis.2014.37 (PMC3973241; doi:10.1038/cddis.2014.37), 2014-03-06
Supplement: cddis201437x2.pdf [file cddis201437x2.pdf]

## Supplementary Figure 2 Liang-Yi Hung

(A)

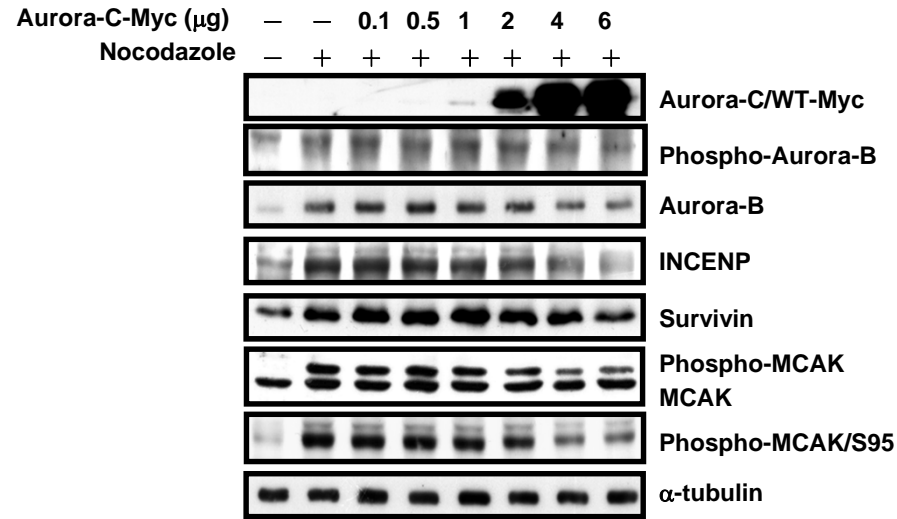

(B)

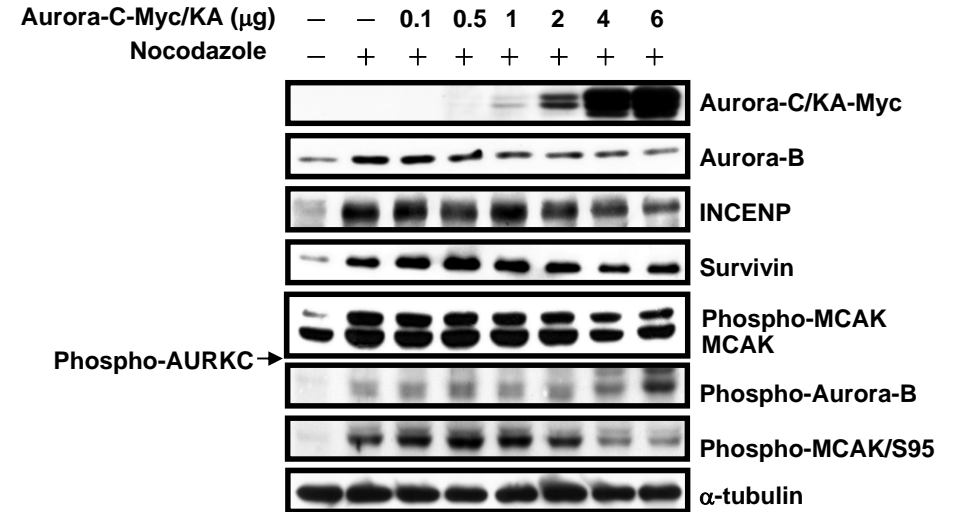

(C)

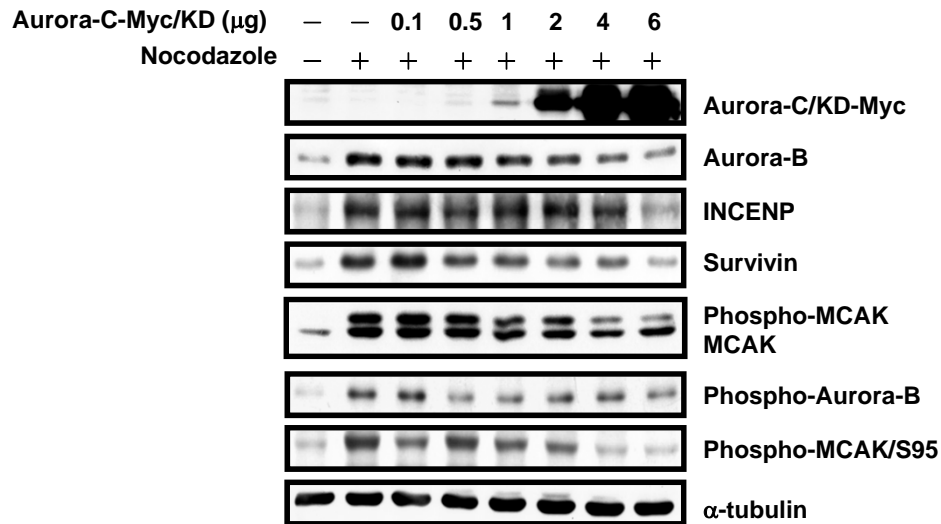

(D)

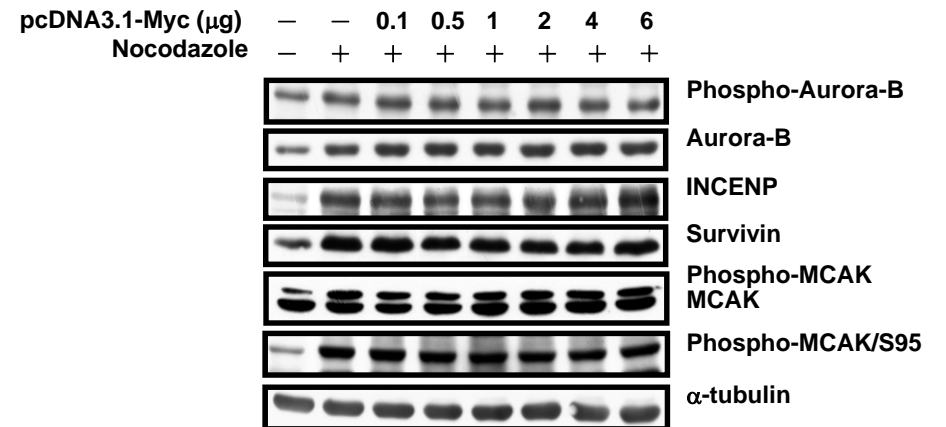

**Supplementary Figure 2. The expression levels of the CPC components and the phosphorylation status of Aurora-B and MCAK in Aurora-C-Myc overexpressing cells.** HeLa cells were transiently transfected with different doses of Aurora-C-Myc (A), Aurora-C-Myc/KA (B), KD (C) or pcDNA3.1-Myc vector control (D), and then treated with nocodazole for 4 h to turn on the spindle checkpoint. The expression levels of Aurora-C-Myc, Aurora-B, INCENP, survivin, borealin, and the phosphorylation status of Aurora-B and MCAK were detected by IB analysis.  $\alpha$ -tubulin was used as a loading control.
